# Supplementary material for: Data driven healthcare insurance system using machine learning and blockchain technologies
Source: PeerJ Comput Sci. 2025 Jul 30;11:e2980. doi: 10.7717/peerj-cs.2980 (PMC12453831; doi:10.7717/peerj-cs.2980)
Supplement: Supplemental Information 2 — Doctor-related metadata including Hospital name, Doctor name, Doctor ID, Department name and ID, Qualifications, and consultation fee. It supports linking review data to doctor profiles and departmental contexts in the analysis. [file peerj-cs-11-2980-s002.xlsx]

## Sheet: datafinal_new
Hospital_Name	Doctor_Name	DoctorID	Department	Dept_ID	Qualification		Fee
H1	H1D001	1	Paediatrics	1	Classified Paediatrician		1000
H1	H1D002	2	Paediatrics	1	Consultant Neonatal Paediatrician & Paeds Neurologist		1000
H1	H1D003	3	Paediatrics	1	Classified Paediatrician		1000
H1	H1D004	4	Paediatrics	1	Classified Paediatrician		1000
H1	H1D005	5	Paediatrics	1	Classified Paediatrician		1000
H1	H1D006	6	Paediatrics Oncology	2	HOD Paediatrics Oncology		1000
H1	H1D007	7	Child Specialist	3	Classified Child Specialist		1000
H1	H1D008	8	Child Specialist	3	Classified Child Specialist		1000
H1	H1D009	9	Child Specialist	3	Classified Child Specialist		1000
H1	H1D010	10	Child Specialist	3	Classified Child Specialist		1000
H1	H1D011	11	Child Specialist	3	HOD Classified Child Specialist		1000
H1	H1D012	12	Neurology	4	Classified Neuro Surgeon		1000
H1	H1D013	13	Gynaecology	5	Classified Gynacologist		1000
H1	H1D014	14	Gynaecology	5	Classified Gynacologist		1000
H1	H1D015	15	Gynaecology	5	Classified Gynacologist		1000
H1	H1D016	16	Gynaecology	5	Classified Gynacologist		1000
H1	H1D017	17	Gynaecology	5	Classified Gynacologist		1000
H1	H1D018	18	Gynaecology	5	Classified Gynacologist		1000
H1	H1D019	19	Gynaecology	5	Classified Gynacologist		1000
H1	H1D020	20	Gynaecology	5	Classified Gynacologist		1000
H1	H1D021	21	Gynaecology	5	Classified Gynacologist		1000
H1	H1D022	22	Gynaecology	5	Classified Gynacologist		1000
H1	H1D023	23	Gynaecology	5	Classified Gynacologist		1000
H1	H1D024	24	Urology	6	Classified Urologist		1000
H1	H1D025	25	Urology	6	Classified Urologist		1000
H1	H1D026	26	Urology	6	Classified Urologist		1000
H1	H1D027	27	Urology	6	Classified Urologist		1000
H1	H1D028	28	Urology	6	Classified Urologist		1000
H1	H1D029	29	Urology	6	Classified Urologist		1000
H1	H1D030	30	Urology	6	Classified Urologist		1000
H1	H1D031	31	Plastic Surgery	7	Classified Plastics Surgeon		1000
H1	H1D032	32	Plastic Surgery	7	Classified Plastics Surgeon		1000
H1	H1D033	33	Plastic Surgery	7	Classified Plastics Surgeon		1000
H1	H1D034	34	ENT	8	Classified ENT		1000
H1	H1D035	35	ENT	8	Classified ENT		1000
H1	H1D036	36	ENT	8	Classified ENT		1000
H1	H1D037	37	ENT	8	Classified ENT		1000
H1	H1D038	38	ENT	8	Classified ENT		1000
H1	H1D039	39	ENT	8	Classified ENT		1000
H1	H1D040	40	ENT	8	HOD Classified ENT		1000
H1	H1D041	41	ENT	8	Classified ENT		1000
H1	H1D042	42	General Surgery	9	Classified Surgeon and Laproscopic Surgeon		1000
H1	H1D043	43	General Surgery	9	Classified Surgeon and Laproscopic Surgeon		1000
H1	H1D044	44	General Surgery	9	Classified Surgeon and Laproscopic Surgeon		1000
H1	H1D045	45	General Surgery	9	Classified Surgeon and Laproscopic Surgeon		1000
H1	H1D046	46	General Surgery	9	HOD Surgery		1000
H1	H1D047	47	General Surgery	9	Classified Surgeon and Laproscopic Surgeon		1000
H1	H1D048	48	General Surgery	9	Classified Surgeon and Laproscopic Surgeon		1000
H1	H1D049	49	General Surgery	9	Classified Surgeon and Laproscopic Surgeon		1000
H1	H1D050	50	Neuro and Thoracic Surgery	10	Thoracic Surgeon		1000
H1	H1D051	51	Neuro and Thoracic Surgery	10	Thoracic Surgeon		1000
H1	H1D052	52	Neuro and Thoracic Surgery	10	Classified Thoracic Surgeon		1000
H1	H1D053	53	Neuro and Thoracic Surgery	10	Classified Neuro Surgeon and Spinal Surgeon		1000
H1	H1D054	54	Neuro and Thoracic Surgery	10	Prof of Surgery HOD and Advisor Thoracic		1000
H1	H1D055	55	Neuro and Thoracic Surgery	10	Advisor and HOD Neuro Surgery		1000
H1	H1D056	56	Neuro and Thoracic Surgery	10	Classified Neuro Surgeon		1000
H1	H1D057	57	Dermatology	11	Classified Dermatology		1000
H1	H1D058	58	Dermatology	11	Classified Dermatology		1000
H1	H1D059	59	Dermatology	11	HOD Dermatology		1000
H1	H1D060	60	Dermatology	11	Classified Dermatology		1000
H1	H1D061	61	Dermatology	11	Classified Dermatology		1000
H1	H1D062	62	Dermatology	11	Classified Rehab		1000
H1	H1D063	63	Dermatology	11	Nutritionist		1000
H1	H1D064	64	Oncology	12	Classified Oncology		1000
H1	H1D065	65	Oncology	12	Classified Oncology		1000
H1	H1D066	66	Oncology	12	Classified Oncology		1000
H1	H1D067	67	Oncology	12	Classified Oncology		1000
H1	H1D068	68	Vascular and Spine Surgery	13	Classified Vascular Surgeon		1000
H1	H1D069	69	Vascular and Spine Surgery	13	Classified Vascular Surgeon		1000
H1	H1D070	70	Vascular and Spine Surgery	13	Classified Spine Surgeon		1000
H1	H1D071	71	Vascular and Spine Surgery	13	HOD Vascular Surgery		1000
H1	H1D072	72	Vascular and Spine Surgery	13	Classifed Spine Surgeon		1000
H1	H1D073	73	Vascular and Spine Surgery	13	HOD Spine Surgery		1000
H1	H1D074	74	Vascular and Spine Surgery	13	Classified Surgeon		1000
H1	H1D075	75	Vascular and Spine Surgery	13	Classified Surgeon		1000
H1	H1D076	76	Vascular and Spine Surgery	13	Classified Surgeon		1000
H1	H1D077	77	Orthopaedics	14	Classified Orthopedic Surgeon		1000
H1	H1D078	78	Orthopaedics	14	Classified Orthopedic Surgeon		1000
H1	H1D079	79	Orthopaedics	14	Advisor/ HOD Orthopedic Surgery		1000
H1	H1D080	80	Orthopaedics	14	Orthopedic Surgeon		1000
H1	H1D081	81	Orthopaedics	14	Orthopedic Surgeon		1000
H2	H2D001	82	Cardiology	15	HOD Interventional Cardiology		3000
H2	H2D002	83	Cardiology	15	Consultant Cardiology		3000
H2	H2D003	84	Cardiology	15	Consultant Cardiology		3000
H2	H2D004	85	Cardiology	15	Consultant Cardiology		3000
H2	H2D005	86	Cardiology	15	Classified Medical Specialist and Consultant Cardiology Fellowship in Cardiology (UK)		3000
H2	H2D006	87	Cardiology	15	Prof of Cardiology Fellowship Interventional Cardiology (UK)		3000
H2	H2D007	88	Cardiology	15	Classified Medical Specialist Consultant Cardiology and Physician		3000
H2	H2D008	89	Cardiology	15	Consultant Cardiology		3000
H2	H2D009	90	Cardiology	15	Samore Pro of Cardiology Consultant Cardiology & Physician		3000
H3	H3D001	91	Child Specialist	3	Classified Child Specialist		1000
H3	H3D002	92	Child Specialist	3	Classified Child Specialist & Consultant Neonatologist		1000
H3	H3D003	93	Paediatrics	1	HOD Classified Paediatrician & Laparoscopic Surgeon		1000
H3	H3D004	94	Paediatrics	1	HOD Classified Paediatrician & Laparoscopic Surgeon		1000
H3	H3D005	95	Paediatrics	1	Classified General and Paediatrician Surgeon		1000
H3	H3D006	96	Paediatrics	1	Classified General and Paediatrician Surgeon		1000
H3	H3D007	97	Dermatology	11	Classified Dermatology		1000
H3	H3D008	98	Dermatology	11	Classified Dermatology		1000
H3	H3D009	99	Dermatology	11	Classified Dermatology		1000
H3	H3D010	100	Dermatology	11	Classified Dermatology		1000
H3	H3D011	101	Dermatology	11	Classified Dermatology		1000
H3	H3D012	102	Dermatology	11	Classified Dermatology		1000
H3	H3D013	103	Dermatology	11	Classified Dermatology		1000
H3	H3D014	104	Nephrology	16	Classified Nephrology		1000
H3	H3D015	105	Nephrology	16	Classified Nephrology		1000
H3	H3D016	106	Nephrology	16	Classified Nephrology		1000
H3	H3D017	107	Critical Care	17	Classified /medical & Infectious Disease Specialist		1000
H3	H3D018	108	Pulmonology	18	Medical Specialist & Pulmonologist		1000
H3	H3D019	109	Pulmonology	18	Medical Physician & Pulmonologist		1000
H3	H3D020	110	Pulmonology	18	Consultant medical & Chest Specialist		1000
H3	H3D021	111	Pulmonology	18	Medical Specialist & Pulmonologist		1000
H3	H3D022	112	ENT	8	Classified ENT		1000
H3	H3D023	113	ENT	8	HOD Classified ENT		1000
H3	H3D024	114	ENT	8	Classified ENT		1000
H3	H3D025	115	ENT	8	Classified ENT		1000
H3	H3D026	116	Gastroentrology	19	Classified Medical Specialist & Gastroentrology		1000
H3	H3D027	117	Gastroentrology	19	HOD classified Gastroentrology		1000
H3	H3D028	118	Gastroentrology	19	Classified Medical Specialist & Gastroentrology		1000
H3	H3D029	119	Gastroentrology	19	Classified Medical Specialist & Gastroentrology & Liver Trasplant Physician		1000
H3	H3D030	120	Liver Transplant	20	HOD Classified General & Laparoscopic Surgeon		1000
H3	H3D031	121	Liver Transplant	20	Classified Surgical Specialist & Laparoscopic Surgeon		1000
H3	H3D032	122	Liver Transplant	20	Laparoscopic Surgeon		1000
H3	H3D033	123	Dentistry	21	Classified Dentist		1000
H3	H3D034	124	General Surgery	9	Head of General Surgery Dept		1000
H3	H3D035	125	General Surgery	9	Classified Surgical Specialist and Laproscopic Surgeon		1000
H3	H3D036	126	General Surgery	9	Classified General Surgery and Laproscopic Surgeon		1000
H3	H3D037	127	General Surgery	9	Consultant Surgeon		1000
H3	H3D038	128	General Surgery	9	Classified Surgical Specialist		1000
H3	H3D039	129	General Surgery	9	Classified Surgical Specialist		1000
H3	H3D040	130	Orthopaedics	14	Classified General Surgery and Orthopaedic Surgeon		1000
H3	H3D041	131	Neurology	4	Head Of Neurology Department (Classified Medical Specialist and Neurophysician)		1000
H3	H3D042	132	Neurology	4	Classified Medical Specialist and Neurophysician		1000
H3	H3D043	133	Neurology	4	Classified Medical Specialist and Neurophysician		1000
H3	H3D044	134	Neurology	4	Consultant Neurophysician and		1000
H3	H3D045	135	Neurology	4	Classified Medical Specialist and Interventional Neurologist		1000
H3	H3D046	136	Rheumatology	22	Head of Rheumatology Dept ( Assistant Prof of Medicine and Rheumatologist)		1000
H3	H3D047	137	Rheumatology	22	Assistant Prof Medicine Classified Medical Specialist and Rheumatologist		1000
H3	H3D048	138	General Medicine	23	Head of Dept (Classified Medical Specilialist)		1000
H3	H3D049	139	General Medicine	23	Classified Medical Specialist		1000
H3	H3D050	140	General Medicine	23	Classified Medical Specialist (Personal Physician to the President of Pakistan)		1000
H3	H3D051	141	General Medicine	23	Classified Medical Specialist		1000
H3	H3D052	142	General Medicine	23	Classified Medical Specialist		1000
H3	H3D053	143	General Medicine	23	Classified Medical Specialist		1000
H3	H3D054	144	General Medicine	23	Classified Medical Specialist		1000
H3	H3D055	145	General Medicine	23	Classified Medical Specialist		1000
H3	H3D056	146	Gynaecology	5	Classified Gynaecologist		1000
H3	H3D057	147	Gynaecology	5	Classified Gynaecologist		1000
H3	H3D058	148	Gynaecology	5	Classified Gynaecologist		1000
H3	H3D059	149	Gynaecology	5	Assistant Professor		1000
H3	H3D060	150	Gynaecology	5	Classified Gynaecologist		1000
H3	H3D061	151	Gynaecology	5	Assistant Professor		1000
H3	H3D062	152	Gynaecology	5	Classified Gynaecologist		1000
H3	H3D063	153	Gynaecology	5	Classified Gynaecologist		1000
H3	H3D064	154	Gynaecology	5	Classified Gynaecologist		1000
H3	H3D065	155	Gynaecology	5	Classified Gynaecologist		1000
H3	H3D066	156	Gynaecology	5	Classified Gynaecologist		1000
H3	H3D067	157	Gynaecology	5	Classified Gynaecologist		1000
H3	H3D068	158	Gynaecology	5	Classified Gynaecologist		1000
H3	H3D069	159	Gynaecology	5	Classified Gynaecologist		1000
H3	H3D070	160	Gynaecology	5	Classified Gynaecologist		1000
H3	H3D071	161	Gynaecology	5	Classified Gynaecologist		1000
H3	H3D072	162	Gynaecology	5	Classified Gynaecologist		1000
H3	H3D073	163	Gynaecology	5	Classified Gynaecologist		1000
H3	H3D074	164	Gynaecology	5	Classified Gynaecologist		1000
H3	H3D075	165	Gynaecology	5	Classified Gynaecologist		1000
H3	H3D076	166	Gynaecology	5	Classified Gynaecologist		1000
H4	H4D001	167	Anesthesiology	24	Associate Consultant(MBBS, FCPS)		3300
H4	H4D002	168	Anesthesiology	24	Consultant(MD, FCPS)		3300
H4	H4D003	169	Anesthesiology	24	Consultant(MBBS, FCPS)		3300
H4	H4D004	170	Anesthesiology	24	Assistant Consultant(MBBS, FCPS)		3300
H4	H4D005	171	Anesthesiology	24	Associate Consultant(MBBS, MCPS, FCPS)		3300
H4	H4D006	172	Anesthesiology	24	Consultant(MBCHB, DARCPS (UK))		3300
H4	H4D007	173	Anesthesiology	24	Consultant(MBBS, MCPS, FCPS)		3300
H4	H4D008	174	Anesthesiology	24	Consultant(MBBS, MCPS, FCPS)		3300
H4	H4D009	175	Anesthesiology	24	Associate Consultant(MBBS, FCPS)		3300
H4	H4D010	176	Anesthesiology	24	Consultant(MBBS, MCPS, FCPS)		3300
H4	H4D011	177	Anesthesiology	24	Consultant(MBBS, MCPS, FCPS)		3300
H4	H4D012	178	Anesthesiology	24	Associate Consultant(MBBS, FCPS)		3300
H4	H4D013	179	Anesthesiology	24	Consultant(MBBS, MCPS, FCPS)		3300
H4	H4D014	180	Anesthesiology	24	Consultant(MBBS, FCPS, Mphil(Health ScEd))		3300
H4	H4D015	181	Anesthesiology	24	Consultant(MBBS, FCPS)		3300
H4	H4D016	182	Anesthesiology	24	Associate Consultant(MBBS, FCPS)		3300
H4	H4D017	183	Anesthesiology	24	Consultant(MBBS, FFA RCSI (Ireland))		3300
H4	H4D018	184	Anesthesiology	24	Associate Consultant(MBBS, FCPS)		3300
H4	H4D019	185	Allergy & Immunology	25	Consultant(MBBS, MD, DABAI(USA))		3300
H4	H4D020	186	Audiology	26	Consultant(MBBS, MSc (Speech & Hearing))		3300
H4	H4D021	187	Cardiac Electrophysiologist	27	Consultant(MBBS, DABIM, DABCVD, DABE)		3300
H4	H4D022	188	Cardiology	15	Consultant(MBBS, MRCP (Ire), MRCP (UK), CCST Cardiology (Ire) , FACC, FSCAI)		3300
H4	H4D023	189	Cardiology	15	Consultant(MBBS, MD, DABIM (USA), DABC(USA), FACC (USA))		3300
H4	H4D024	190	Cardiology	15	Consultant(MBBS, MD, DABIM (USA) DABIC (USA))		3300
H4	H4D025	191	Cardiology	15	Consultant(MBBS, FCPS (Med), FCPS (Card))		3300
H4	H4D026	192	Cardiology	15	Consultant(MBBS,FCPS)		3300
H4	H4D027	193	Cardiology	15	Consultant(MBBS, FMGEM (USA), MRCP (UK))		3300
H4	H4D028	194	Cardiology	15	Consultant(MBBS, ABIM, ABCVD, ABIC)		3300
H4	H4D029	195	Cardiology	15	Consultant(MBBS, DABIM, DABCVD)		3300
H4	H4D030	196	Cardiology	15	Consultant(MBBS, MRCP (UK), ABIC, ABCVD)		3300
H4	H4D031	197	Cardiothoracic Surgeon	28	Consultant(MBBS, MRCS, FRCS, CCT)		3300
H4	H4D032	198	Cardiothoracic Surgeon	28	Consultant(MBBS, FRCS)		3300
H4	H4D033	199	Cardiothoracic Surgeon	28	Consultant(MBBS, FCPS, MRCS, FRCS, CCT)		3300
H4	H4D034	200	Dentistry	21	Consultant(BDS, PhD, FDS(Orth), RCS, MOrthRCS, FFDRCSI(Orth), FDSRCS)		3300
H4	H4D035	201	Dentistry	21	Consultant(BDS, MSc (Prosthetic Dentistry))		3300
H4	H4D036	202	Dentistry	21	Consultant(BDS, FDSRCS)		3300
H4	H4D037	203	Dermatology	11	Consultant(MBBS, FCPS, MCPS)		3300
H4	H4D038	204	Dermatology	11	Consultant(MBBS, FCPS)		3300
H4	H4D039	205	Dermatology	11	Associate Consultant(MBBS, FCPS)		3300
H4	H4D040	206	Dermatology	11	Associate Consultant(MBBS, FCPS)		3300
H4	H4D041	207	ENT	8	Consultant(MBBS,FRCS (UK))		3300
H4	H4D042	208	ENT	8	Consultant(MBBS, MRCS (Edn), CCT(UK), FRCS-ORL-HNS(Edn))		3300
H4	H4D043	209	ENT	8	Consultant(MBBS, DLO (PAK))		3300
H4	H4D044	210	ENT	8	Consultant(MBBS, MCPS, FCPS)		3300
H4	H4D045	211	ENT	8	Consultant(MBBS, FCPS)		3300
H4	H4D046	212	Emergency	29	Associate Consultant(MBBS, FCPS (Medicine))		3300
H4	H4D047	213	Emergency	29	Consultant(MBBS, FACP (USA), DABIM (USA))		3300
H4	H4D048	214	Emergency	29	Associate Consultant(MBBS, MRCP (UK))		3300
H4	H4D049	215	Emergency	29	Consultant(MBBS, MRCP (UK))		3300
H4	H4D050	216	Emergency	29	Consultant(MBBS, MRCEM)		3300
H4	H4D051	217	Emergency	29	Associate Consultant(MBBS, FCPS)		3300
H4	H4D052	218	Emergency	29	Consultant(MBBS, FCPS, CCT)		3300
H4	H4D053	219	Emergency	29	Pediatrician (Ed)(MBBS, DABP)		3300
H4	H4D054	220	Endocrinology	30	Consultant(MBBS, MRCP UK, MRCP (Endocrinology & Diabetes) UK, CCT Endocrinology & Diabetes UK, CCT General (Internal) Medicine, UK)		3300
H4	H4D055	221	Endocrinology	30	Associate Consultant(MBBS, FCPS (Medicine), FCPS (Endocrinology), SCE-Endocrinology & Diabetes (UK))		3300
H4	H4D056	222	Endocrinology	30	Consultant(MBBS, DABIM (USA), DABE (USA))		3300
H4	H4D057	223	Endocrinology	30	Consultant(MBBS, FCPS, MCPS)		3300
H4	H4D058	224	Endocrinology	30	Associate Consultant(MBBS, MRCP, CCT)		3300
H4	H4D059	225	Endocrinology	30	Consultant(MBBS, MRCP (UK), MRCP- DE (UK))		3300
H4	H4D060	226	Executive & Employee Clinic	31	Assistant Consultant(MBBS, FCPS)		3300
H4	H4D061	227	Executive & Employee Clinic	31	Senior Fellow		3300
H4	H4D062	228	Family Health	32	Consultant(MBBS, MRCGP, MRCOG)		3300
H4	H4D063	229	Family Health	32	Consultant(MBBS, MRCP, MRCGP)		3300
H4	H4D064	230	Gastroentrology	19	Consultant(MBBS (KE), MRCP (UK), SCE-Gastroentrology (UK), CCT-Gastroentrology (UK), CCT-General (Internal) Medicine (UK))		3300
H4	H4D065	231	Gastroentrology	19	Consultant(MBBS, FCPS(Med.) FCPS (Gastro))		3300
H4	H4D066	232	Gastroentrology	19	Associate Consultant(MBBS, FCPS)		3300
H4	H4D067	233	Gastroentrology	19	Consultant(MBBS, FCPS (Medicine), FCPS (Gastroentrology))		3300
H4	H4D068	234	Gastroentrology	19	Consultant(MBBS, MRCP- Med(UK), MRCP- Gastro (UK), CCT (UK))		3300
H4	H4D069	235	Gastroentrology	19	Consultant(MBBS, MRCP, CSCST)		3300
H4	H4D070	236	Gastroentrology	19	Assistant Consultant(MBBS, FCPS)		3300
H4	H4D071	237	Gastroentrology	19	Consultant(MBBS, DABIM, DABG)		3300
H4	H4D072	238	Gastroentrology	19	Consultant(MBBS, FRCP (UK), MRCP (UK), M.Sc.- HPE (UK))		3300
H4	H4D073	239	Gastroentrology	19	Assistant Consultant(MBBS, FCPS)		3300
H4	H4D074	240	Gastroentrology	19	Consultant(MBBS, ABIM, ABG)		3300
H4	H4D075	241	Gastroentrology	19	Consultant(MBBS, DABIM, DABG, DABOM)		3300
H4	H4D076	242	General Surgery	9	Consultant(MBBS, MD, DABS, FACS)		3300
H4	H4D077	243	General Surgery	9	Consultant(MBBS, FRCSI)		3300
H4	H4D078	244	General Surgery	9	Consultant(MBBS,MD, FACS, DABGM (USA), DABSO(USA))		3300
H4	H4D079	245	General Surgery	9	Consultant(MBBS, FRCS (UK))		3300
H4	H4D080	246	General Surgery	9	Consultant(MBBS, FCPS, FRCS (UK))		3300
H4	H4D081	247	General Surgery	9	Associate Consultant(MBBS, FCPS)		3300
H4	H4D082	248	General Surgery	9	Consultant(MBBS, FCPS)		3300
H4	H4D083	249	General Surgery	9	Consultant(MBBS, FRCS (UK), FCPS)		3300
H4	H4D084	250	General Surgery	9	Consultant(MBBS, FRCS)		3300
H4	H4D085	251	General Surgery	9	Associate Consultant(MBBS, FCPS, FRCS(Edn), MRCS(UK), FEBS/Upper GI)		3300
H4	H4D086	252	General Surgery	9	Consultant(MBBS, MD(Canada) FCPS)		3300
H4	H4D087	253	General Surgery	9	Consultant(MBBS, FCPS, FRCS(Glasgow), FRCS-Gen Surgery(Glasgow))		3300
H4	H4D088	254	General Surgery	9	Consultant(MBBS, FCPS, MRCS(UK))		3300
H4	H4D089	255	General Surgery	9	Consultant(MBBS, FCPS , MCPS, MRCS (Glasgow))		3300
H4	H4D090	256	General Surgery	9	Consultant(MBBS, FRCS(England), CCT(UK))		3300
H4	H4D091	257	General Surgery	9	Consultant(MBBS, FRCS (ENG), CCT (UK))		3300
H4	H4D092	258	General Surgery	9	Associate Consultant(MBBS, FRCS (Edn) MRCS (Ire))		3300
H4	H4D093	259	Infectious Diseases	33	Assistant Consultant(MBBS, FCPS (Medicine), FCPS (Infectious Diseases))		3300
H4	H4D094	260	Infectious Diseases	33	Consultant(MBBS, DABIM ID)		3300
H4	H4D095	261	Infectious Diseases	33	Consultant(MBBS, FCPS (Infectious Diseases), FCPS (Internal Medicine), FACP)		3300
H4	H4D096	262	Interventional Radiology	34	Consultant(MBBS, MD, DABR (USA))		3300
H4	H4D097	263	Interventional Radiology	34	Consultant(FRCR (UK), EBIR, CCT (UK), MRCS (Ed))		3300
H4	H4D098	264	Interventional Radiology	34	Consultant(MRCS (UK), FRCR (UK), EBIR, CCT(UK))		3300
H4	H4D099	265	Interventional Radiology	34	Consultant(MBBS, FCPS)		3300
H4	H4D100	266	Liver Transplant	20	Consultant(MBBS, FCPS (Gen. Surgery))		3300
H4	H4D101	267	Liver Transplant	20	Consultant(MBBS, FCPS, MRCS)		3300
H4	H4D102	268	Liver Transplant	20	Consultant(MBBS, FCPS)		3300
H4	H4D103	269	Medical Specialist	35	Consultant(MBBS, MD, DABIM (USA))		3300
H4	H4D104	270	Medical Specialist	35	Medical Specialist(MBBS, ABIM)		3300
H4	H4D105	271	Medical Specialist	35	Associate Consultant(MBBS, MRCP, FCPS)		3300
H4	H4D106	272	Medical Specialist	35	Consultant(MBBS, MD, DABIM (USA))		3300
H4	H4D107	273	Medical Specialist	35	Consultant(MBBS, MD, DABIM (USA), Dip Card (UK))		3300
H4	H4D108	274	Medical Specialist	35	Medical Specialist(MBBS, FCPS)		3300
H4	H4D109	275	Medical Specialist	35	Consultant(MBBS, FCPS, MCPS, MRCP (UK))		3300
H4	H4D110	276	Medical Specialist	35	Medical Specialist(MBBS, FCPS)		3300
H4	H4D111	277	Medical Specialist	35	Associate Consultant(MBBS, FCPS)		3300
H4	H4D112	278	Medical Specialist	35	Consultant(MBBS, FCPS, MCPS)		3300
H4	H4D113	279	Medical Specialist	35	Consultant(MBBS, MD, DABIM (USA))		3300
H4	H4D114	280	Medical Specialist	35	Associate Consultant(MBBS, DABIM)		3300
H4	H4D115	281	Medical Specialist	35	Consultant(MBBS, MRCP, CCT)		3300
H4	H4D116	282	Medical Specialist	35	Consultant(MBBS, FCPS)		3300
H4	H4D117	283	Nephrology	16	Consultant(MBBS, Fellow (Nephrology), DABIM N(USA))		3300
H4	H4D118	284	Nephrology	16	Consultant(MBBS, MD (USA))		3300
H4	H4D119	285	Nephrology	16	Consultant(MBBS, DABIM, Fellowship in Nephrology)		3300
H4	H4D120	286	Nephrology	16	Consultant(MBBS, FRACP)		3300
H4	H4D121	287	Nephrology	16	Associate Consultant(MBBS, FCPS)		3300
H4	H4D122	288	Nephrology	16	Consultant(MBBS, FCPS)		3300
H4	H4D123	289	Nephrology	16	Consultant(MBBS, DABIM, DABN)		3300
H4	H4D124	290	Nephrology	16	Consultant(MBBS, MD, DABIM N (USA))		3300
H4	H4D125	291	Neurology	4	Consultant(MBBS, MD)		3300
H4	H4D126	292	Neurology	4	Consultant(MBBS, FCPS)		3300
H4	H4D127	293	Neurology	4	Consultant(MBBS, MCPS, FCPS)		3300
H4	H4D128	294	Neurology	4	Consultant(MBBS, FCPS)		3300
H4	H4D129	295	Neurology	4	Associate Consultant(MBBS, FCPS)		3300
H4	H4D130	296	Neurology	4	Consultant(MBBS, FCPS)		3300
H4	H4D131	297	Neurology	4	Consultant(MBBS, FCPS)		3300
H4	H4D132	298	Neurology	4	Consultant(MBBS, FCPS)		3300
H4	H4D133	299	Neurosurgery	36	Consultant(MBBS, FRCS-Neurosurgery (Edinburgh, UK), CCT-Neurosurgery (UK))		3300
H4	H4D134	300	Neurosurgery	36	Consultant(MBBS, FCPS)		3300
H4	H4D135	301	Neurosurgery	36	Consultant(MBBS, FCPS)		3300
H4	H4D136	302	Nutritionist	37	Consultant(Ph. D. FOOD NUTRITION (USA))		3300
H4	H4D137	303	OB/Gyne	38	Consultant(MBBS,FCPS)		3300
H4	H4D138	304	OB/Gyne	38	Consultant(MBBS, FCPS, MCPS)		3300
H4	H4D139	305	OB/Gyne	38	Consultant(MBBS, MRCOG(UK), RDMS, RDCS(USA), MUSP Residency)		3300
H4	H4D140	306	OB/Gyne	38	Consultant(MBBS, MRCOG (UK), FRCOG (UK))		3300
H4	H4D141	307	OB/Gyne	38	Consultant(MBBS, FCPS, DGO, F.MAS, D.MAS)		3300
H4	H4D142	308	OB/Gyne	38	Consultant(MBBS, FCPS, MCPS)		3300
H4	H4D143	309	OB/Gyne	38	Consultant(MBBS, MRCOG (UK), CCT (UK))		3300
H4	H4D144	310	Oncology	12	Consultant(MBBS, FCPS)		3300
H4	H4D145	312	Oncology	12	Associate Consultant(MBBS, FCPS, FRCR)		3300
H4	H4D146	313	Oncology	12	Consultant(MBBS, FFRRCS (IRE), DMRT (UK))		3300
H4	H4D147	314	Oncology	12	Consultant(MBBS, MD, DABR (USA))		3300
H4	H4D148	315	Oncology	12	Consultant(MBBS,DMRT, FCPS(Radiotherapy), CCST (Clinical Oncology))		3300
H4	H4D149	316	Oncology	12	Consultant(MBBS, DABIMMO, FCCP (USA),FRCP (Canada))		3300
H4	H4D150	317	Oncology	12	Consultant(MBBS, FCPS (Pathology), FCPS (Hematology))		3300
H4	H4D151	318	Oncology	12	Consultant(MBBS, FCPS)		3300
H4	H4D152	319	Oncology	12	Assistant Consultant(MBBS, FCPS)		3300
H4	H4D153	320	Oncology	12	Consultant(MBBS, DABIM (USA), DABH (USA))		3300
H4	H4D154	321	Oncology	12	Consultant(MD, MRCP, CCT (Medical Oncology))		3300
H4	H4D155	322	Oncology	12	Consultant(MBBS, DABIM, DABH, DABIM)		3300
H4	H4D156	323	Opthalmology	39	Consultant(MBBS, MCPS, FCPS)		3300
H4	H4D157	324	Opthalmology	39	Connsultant(MBBS, FRCO (UK))		3300
H4	H4D158	325	Opthalmology	39	Consultant(MBBS, MRCOphth, MRCS (Ed), FRCOphth, FRCS (Ed), FRCS (Glasg) CCT (UK))		3300
H4	H4D159	326	Opthalmology	39	Consultant(MBBS, MCPS, FCPS, FRCS (UK))		3300
H4	H4D160	327	Opthalmology	39	Consultant(MBBS, FCPS, FRCS)		3300
H4	H4D161	328	Opthalmology	39	Consultant(MBBS, FCPS , FRCS (UK))		3300
H4	H4D162	329	Oral & Maxillofacial Surgery	40	Associate Consultant(BDS, FCPS)		3300
H4	H4D163	330	Oral & Maxillofacial Surgery	40	Consultant(BDS, MCPS, FCPS)		3300
H4	H4D164	331	Orthopaedic	14	Consultant(MBBS, FRCS (UK))		3300
H4	H4D165	332	Orthopaedic	14	Consultant(MBBS, FRCS, Tr Orth (IRE))		3300
H4	H4D166	333	Orthopaedic	14	Consultant(MBBS, MSc(Biomechanics), FRCS (UK), FRCS(Tr Ortho))		3300
H4	H4D167	334	Orthopaedic	14	Consultant(MBBS, FCPS, FRCS)		3300
H4	H4D168	335	Pain Management	41	Associate Consultant(MBBS, FCPS, Dip in Anesthesiology)		3300
H4	H4D169	336	Pain Management	41	Associate Consultant(MBBS, FCPS , MCPS)		3300
H4	H4D170	337	Palliative Care	42	Consultant(MBBS, MRCP (UK))		3300
H4	H4D171	338	Pathology	43	Pathology(MBBS, FCPS (HISTO))		3300
H4	H4D172	339	Pathology	43	Consultant(MBBS, FCPS)		3300
H4	H4D173	340	Pathology	43	Consultant HistoPathology(MBBS, FCPS)		3300
H4	H4D174	341	Pathology	43	Pathology(MBBS, DCP, Mphil)		3300
H4	H4D175	342	Pathology	43	Pathology(MBBS, MCPS, FCPS , FRCPath (UK))		3300
H4	H4D176	343	Pathology	43	Consultant(MBBS, DAB (HISTOPATHOLOGY))		3300
H4	H4D177	344	Pathology	43	Consultant(MBBS, FCPS)		3300
H4	H4D178	345	Pathology	43	Consultant(MBBS, MCPS, FCPS)		3300
H4	H4D179	346	Pathology	43	Consultant(MBBS, FCPS (Hematology))		3300
H4	H4D180	347	Pathology	43	Consultant(MBBS, FCPS (Histopathology),MIAC)		3300
H4	H4D181	348	Pathology	43	Consultant(MBBS,FCPS)		3300
H4	H4D182	349	Pathology	43	Associate Consultant(MBBS, FCPS)		3300
H4	H4D183	350	Pathology	43	Consultant(MBBS, FCPS (Chemical Pathology))		3300
H4	H4D184	351	Pathology	43	Consultant(MBBS, FCPS)		3300
H4	H4D185	352	Pathology	43	Associate Consultant(MBBS, FCPS)		3300
H4	H4D186	353	Pathology	43	Assistant Consultant(MBBS, FCPS)		3300
H4	H4D187	354	Pead. Dentist & Orthodontist	44	Associate Consultant(BDS, MRCS (UK), MRCS (Edn), MCPD (London))		3300
H4	H4D188	355	Peads Cardiac Surgeon	45	Consultant(MBBS, DSS, FAMS, FVMA)		3300
H4	H4D189	356	Pediatric Oncology	2	Consultant(MBBS, FCPS (Peads), FCPS (Pediatric Cardiology))		3300
H4	H4D190	357	Pediatric Dermatology	46	Consultant(MBBS, MRCPCH, FRCPCH, CCT)		3300
H4	H4D191	358	Pediatric Surgeon	47	Consultant(MBBS, FCPS)		3300
H4	H4D192	359	Pediatric Surgeon	47	Consultant(MBBS, FCPS (Surgery), FCPS (Pediatric Surgery))		3300
H4	H4D193	360	Pediatrician	48	Consultant(MBBS, FCPS, MCPS)		3300
H4	H4D194	361	Pediatrician	48	Consultant(MBBS,DABP, DABID)		3300
H4	H4D195	362	Pediatrician	48	Consultant(MBBS,MCPS,MRCP(Ireland))		3300
H4	H4D196	363	Pediatrician	48	Associate Consultant(MBBS, FCPS)		3300
H4	H4D197	364	Pediatrician	48	Consultant(MBBS, DCH, MRCP(UK), FRCPCH)		3300
H4	H4D198	365	Pediatrician	48	Consultant(MBBS, MD, DABP (USA))		3300
H4	H4D199	366	Pediatrician	48	Consultant(MBBS, DABP)		3300
H4	H4D200	367	Pediatrician	48	Consultant(MBBS, MD, DABP (USA))		3300
H4	H4D201	368	Pediatrician	48	Consultant(MBBS, MRCPH, FRCPH, CCT)		3300
H4	H4D202	369	Pediatrician	48	Consultant(MBBS, DABP, DABN)		3300
H4	H4D203	370	Pediatrician	48	Consultant(MBBS, FCPS)		3300
H4	H4D204	371	Pediatrician	48	Consultant(MBBS, DABP)		3300
H4	H4D205	372	Pediatrician	48	Consultant(MBBS(KE) MCPS, FCPS, MRCPCH , FRCPCH , CCT UK)		3300
H4	H4D206	373	Pediatrician	48	Consultant(MBBS, DCH (Ire), MRCP (Ire))		3300
H4	H4D207	374	Pediatrician	48	Consultant(MBBS, FCPS)		3300
H4	H4D208	375	Physical Med & Rehabilitation	49	Consultant(MBBS, PG Diploma in Rehab, FCPS)		3300
H4	H4D209	376	Plastic Surgery	7	Consultant(MBBS, FCPS, FRCS)		3300
H4	H4D210	377	Plastic Surgery	7	Consultant(MBBS, FCPS, FRCS)		3300
H4	H4D211	378	Plastic Surgery	7	Consultant(MBBS, FCPS)		3300
H4	H4D212	379	Plastic Surgery	7	Associate Consultant(MBBS, FCPS, FRCS)		3300
H4	H4D213	380	Psychiatrist	50	Consultant(MBBS, FCPS, Diploma in Psychological Medicine)		3300
H4	H4D214	381	Psychiatrist	50	Consultant(MBBS, MRCPsyh, CCT)		3300
H4	H4D215	382	Psychiatrist	50	Consultant(MBBS, MRC Psych (UK), Diploma in Psychiatry (Ireland))		3300
H4	H4D216	383	Psychiatrist	50	Associate Consultant(MBBS, FCPS)		3300
H4	H4D217	384	Psychiatrist	50	Associate Consultant(MBBS, MRCPsych UK)		3300
H4	H4D218	385	Pulmonology	18	Consultant(MBBS, DABIM, DABCCM (USA))		3300
H4	H4D219	386	Pulmonology	18	Consultant(MBBS, FCPS)		3300
H4	H4D220	387	Pulmonology	18	Consultant(MBBS, DABIM, DABPCC)		3300
H4	H4D221	388	Rheumatology	22	Consultant(MBBS,MRCP (Medicine), MRCP (Rheumatology), MSc)		3300
H4	H4D222	389	Rheumatology	22	Consultant(MBBS, MRCP, FRCP)		3300
H4	H4D223	390	Stroke Medicine & Neurorehab	51	Consultant(MBBS, MRCP, CCT(Stroke Medicine), UK)		3300
H4	H4D224	391	Urology	6	Consultant(MBBS, FCPS (Surgery) FCPS (Urology), MRCS Ed FRCS (Urology))		3300
H4	H4D225	392	Urology	6	Consultant(MBBS, FRCS (UK), Diploma in Urology (UK))		3300
H4	H4D226	393	Urology	6	Consultant(MBBS, FCPS, FRCS)		3300
H4	H4D227	394	Urology	6	Consultant(MBBS, FCPS)		3300
H4	H4D228	395	Urology	6	Associate Consultant(MBBS, FCPS, MD (USA))		3300
H4	H4D229	396	Urology	6	Consultant(MBBS, FCPS)		3300
H4	H4D230	397	Urology	6	Consultant(MBBS, FCPS)		3300
H4	H4D231	398	Urology	6	Consultant(MBBS, FRCS, Dip. in Urology (London))		3300
H4	H4D232	399	Bone Marrow Transplant	52	Director, Bone Marrow & Stem Cell Transplant(MBBS, DAB (Internal Medicine & Hematology), Fellowship BMT, Mayo Clinics)		3300
H4	H4D233	400	Bone Marrow Transplant	52	Consultant Haematologist & Bone Marrow Transplant Specialist(MBBS, FCPS (Haem), MCPS, FRCPath (Haem), B.M.T. Certification (U.K.))		3300
H4	H4D234	401	Bone Marrow Transplant	52	Consultant Bone Marrow Transplant Specialist(MBBS, DAB (Internal Medicine, Hematology/ Oncology))		3300
H4	H4D235	402	Bone Marrow Transplant	52	Consultant Haematologist(MBBS, FCPS (Internal Medicine, Hematology/ Oncology), Member American Society of Hematology)		3300
H4	H4D236	403	Allergy & Immunology	25	consultant		3300
H4	H4D237	404	Bone Marrow Transplant	52	consultant		3300
H4	H4D238	405	Medical Specialist	35	consultant		3300
H4	H4D239	406	Allergy & Immunology	25	consultant		3300
H4	H4D240	407	Bone Marrow Transplant	52	consultant		3300
H4	H4D241	408	Medical Specialist	35	consultant		3300
H4	H4D242	409	Neurosurgery	36	consultant		3300
H4	H4D243	500	Orthopaedics	14	consultant		3300
H4	H4D244	501	Nephrology	16	consultant		3300
H4	H4D245	502	Neurosurgery	36	consultant		3300
H1	H1D082	503	Child Specialist	3	consultant		1000
H1	H1D083	504	Orthopaedics	14	consultant		1000
H2	H2D010	505	Child Specialist	3	consultant		1000
H2	H2D011	506	Nephrology	16	consultant		1000
H2	H2D012	507	Orthopaedics	14	consultant		1000
H2	H2D013	508	Rheumatology	22	consultant		1000
H2	H2D014	509	Rheumatology	22	consultant		1000
H4	H4D240	407	Bone Marrow Transplant	52	consultant		3300
H4	H4D241	408	Medical Specialist	35	consultant		3300
H4	H4D242	409	Neurosurgery	36	consultant		3300
H4	H4D243	500	Orthopaedics	14	consultant		3300
H4	H4D244	501	Nephrology	16	consultant		3300
H4	H4D245	502	Neurosurgery	36	consultant		3300
H1	H1D082	503	Child Specialist	3	consultant		1000
H1	H1D083	504	Orthopaedics	14	consultant		1000
H2	H2D010	505	Child Specialist	3	consultant		1000
H2	H2D011	506	Nephrology	16	consultant		1000
H2	H2D012	507	Orthopaedics	14	consultant		1000
H2	H2D013	508	Rheumatology	22	consultant		1000
H2	H2D014	509	Rheumatology	22	consultant		1000
H4	H4D236	403	Allergy & Immunology	25	consultant		3300
H4	H4D237	404	Bone Marrow Transplant	52	consultant		3300
H4	H4D238	405	Medical Specialist	35	consultant		3300
H4	H4D239	406	Allergy & Immunology	25	consultant		3300
H4	H4D157	324	Opthalmology	39	Connsultant(MBBS, FRCO (UK))		3300
H4	H4D158	325	Opthalmology	39	Consultant(MBBS, MRCOphth, MRCS (Ed), FRCOphth, FRCS (Ed), FRCS (Glasg) CCT (UK))		3300
H4	H4D159	326	Opthalmology	39	Consultant(MBBS, MCPS, FCPS, FRCS (UK))		3300
H4	H4D160	327	Opthalmology	39	Consultant(MBBS, FCPS, FRCS)		3300
H4	H4D161	328	Opthalmology	39	Consultant(MBBS, FCPS , FRCS (UK))		3300
H4	H4D162	329	Oral & Maxillofacial Surgery	40	Associate Consultant(BDS, FCPS)		3300
H4	H4D163	330	Oral & Maxillofacial Surgery	40	Consultant(BDS, MCPS, FCPS)		3300
H4	H4D164	331	Orthopaedic	14	Consultant(MBBS, FRCS (UK))		3300
H4	H4D157	324	Opthalmology	39	Connsultant(MBBS, FRCO (UK))		3300
H4	H4D158	325	Opthalmology	39	Consultant(MBBS, MRCOphth, MRCS (Ed), FRCOphth, FRCS (Ed), FRCS (Glasg) CCT (UK))		3300
H4	H4D159	326	Opthalmology	39	Consultant(MBBS, MCPS, FCPS, FRCS (UK))		3300
H4	H4D160	327	Opthalmology	39	Consultant(MBBS, FCPS, FRCS)		3300
H4	H4D161	328	Opthalmology	39	Consultant(MBBS, FCPS , FRCS (UK))		3300
H4	H4D162	329	Oral & Maxillofacial Surgery	40	Associate Consultant(BDS, FCPS)		3300
H4	H4D163	330	Oral & Maxillofacial Surgery	40	Consultant(BDS, MCPS, FCPS)		3300
H4	H4D164	331	Orthopaedic	14	Consultant(MBBS, FRCS (UK))		3300
H1	H1D007	7	Child Specialist	3	Classified Child Specialist		1000
H1	H1D008	8	Child Specialist	3	Classified Child Specialist		1000
H1	H1D009	9	Child Specialist	3	Classified Child Specialist		1000
H1	H1D010	10	Child Specialist	3	Classified Child Specialist		1000
H1	H1D011	11	Child Specialist	3	HOD Classified Child Specialist		1000
H1	H1D012	12	Neurology	4	Classified Neuro Surgeon		1000
H1	H1D013	13	Gynaecology	5	Classified Gynacologist		1000
H4	H4D164	331	Orthopaedic	14	Consultant(MBBS, FRCS (UK))		3300
H4	H4D157	324	Opthalmology	39	Connsultant(MBBS, FRCO (UK))		3300
H4	H4D158	325	Opthalmology	39	Consultant(MBBS, MRCOphth, MRCS (Ed), FRCOphth, FRCS (Ed), FRCS (Glasg) CCT (UK))		3300
H4	H4D159	326	Opthalmology	39	Consultant(MBBS, MCPS, FCPS, FRCS (UK))		3300
H4	H4D160	327	Opthalmology	39	Consultant(MBBS, FCPS, FRCS)		3300
H4	H4D161	328	Opthalmology	39	Consultant(MBBS, FCPS , FRCS (UK))		3300
H4	H4D162	329	Oral & Maxillofacial Surgery	40	Associate Consultant(BDS, FCPS)		3300
H1	H1D001	1	Paediatrics	1	Classified Paediatrician		1000
H1	H1D002	2	Paediatrics	1	Consultant Neonatal Paediatrician & Paeds Neurologist		1000
H1	H1D003	3	Paediatrics	1	Classified Paediatrician		1000
H1	H1D004	4	Paediatrics	1	Classified Paediatrician		1000
H1	H1D005	5	Paediatrics	1	Classified Paediatrician		1000
H1	H1D006	6	Paediatrics Oncology	2	HOD Paediatrics Oncology		1000
H1	H1D007	7	Child Specialist	3	Classified Child Specialist		1000
H1	H1D008	8	Child Specialist	3	Classified Child Specialist		1000
H1	H1D009	9	Child Specialist	3	Classified Child Specialist		1000
H1	H1D010	10	Child Specialist	3	Classified Child Specialist		1000
H1	H1D011	11	Child Specialist	3	HOD Classified Child Specialist		1000
H1	H1D012	12	Neurology	4	Classified Neuro Surgeon		1000
H1	H1D013	13	Gynaecology	5	Classified Gynacologist		1000
H1	H1D014	14	Gynaecology	5	Classified Gynacologist		1000
H1	H1D015	15	Gynaecology	5	Classified Gynacologist		1000
H1	H1D016	16	Gynaecology	5	Classified Gynacologist		1000
H1	H1D017	17	Gynaecology	5	Classified Gynacologist		1000
H1	H1D018	18	Gynaecology	5	Classified Gynacologist		1000
H1	H1D019	19	Gynaecology	5	Classified Gynacologist		1000
H1	H1D020	20	Gynaecology	5	Classified Gynacologist		1000
H1	H1D021	21	Gynaecology	5	Classified Gynacologist		1000
H1	H1D022	22	Gynaecology	5	Classified Gynacologist		1000
H1	H1D023	23	Gynaecology	5	Classified Gynacologist		1000
H1	H1D024	24	Urology	6	Classified Urologist		1000
H1	H1D025	25	Urology	6	Classified Urologist		1000
H1	H1D026	26	Urology	6	Classified Urologist		1000
H1	H1D027	27	Urology	6	Classified Urologist		1000
H1	H1D028	28	Urology	6	Classified Urologist		1000
H1	H1D029	29	Urology	6	Classified Urologist		1000
H1	H1D030	30	Urology	6	Classified Urologist		1000
H1	H1D031	31	Plastic Surgery	7	Classified Plastics Surgeon		1000
H1	H1D032	32	Plastic Surgery	7	Classified Plastics Surgeon		1000
H1	H1D033	33	Plastic Surgery	7	Classified Plastics Surgeon		1000
H1	H1D034	34	ENT	8	Classified ENT		1000
H1	H1D035	35	ENT	8	Classified ENT		1000
H1	H1D036	36	ENT	8	Classified ENT		1000
H1	H1D037	37	ENT	8	Classified ENT		1000
H1	H1D038	38	ENT	8	Classified ENT		1000
H1	H1D039	39	ENT	8	Classified ENT		1000
H1	H1D040	40	ENT	8	HOD Classified ENT		1000
H1	H1D041	41	ENT	8	Classified ENT		1000
H1	H1D042	42	General Surgery	9	Classified Surgeon and Laproscopic Surgeon		1000
H1	H1D043	43	General Surgery	9	Classified Surgeon and Laproscopic Surgeon		1000
H1	H1D044	44	General Surgery	9	Classified Surgeon and Laproscopic Surgeon		1000
H1	H1D045	45	General Surgery	9	Classified Surgeon and Laproscopic Surgeon		1000
H1	H1D046	46	General Surgery	9	HOD Surgery		1000
H1	H1D047	47	General Surgery	9	Classified Surgeon and Laproscopic Surgeon		1000
H1	H1D048	48	General Surgery	9	Classified Surgeon and Laproscopic Surgeon		1000
H1	H1D049	49	General Surgery	9	Classified Surgeon and Laproscopic Surgeon		1000
H1	H1D050	50	Neuro and Thoracic Surgery	10	Thoracic Surgeon		1000
H1	H1D051	51	Neuro and Thoracic Surgery	10	Thoracic Surgeon		1000
H1	H1D052	52	Neuro and Thoracic Surgery	10	Classified Thoracic Surgeon		1000
H1	H1D053	53	Neuro and Thoracic Surgery	10	Classified Neuro Surgeon and Spinal Surgeon		1000
H1	H1D054	54	Neuro and Thoracic Surgery	10	Prof of Surgery HOD and Advisor Thoracic		1000
H1	H1D055	55	Neuro and Thoracic Surgery	10	Advisor and HOD Neuro Surgery		1000
H1	H1D056	56	Neuro and Thoracic Surgery	10	Classified Neuro Surgeon		1000
H1	H1D057	57	Dermatology	11	Classified Dermatology		1000
H1	H1D058	58	Dermatology	11	Classified Dermatology		1000
H1	H1D059	59	Dermatology	11	HOD Dermatology		1000
H1	H1D060	60	Dermatology	11	Classified Dermatology		1000
H1	H1D061	61	Dermatology	11	Classified Dermatology		1000
H1	H1D062	62	Dermatology	11	Classified Rehab		1000
H1	H1D063	63	Dermatology	11	Nutritionist		1000
H1	H1D064	64	Oncology	12	Classified Oncology		1000
H1	H1D065	65	Oncology	12	Classified Oncology		1000
H1	H1D066	66	Oncology	12	Classified Oncology		1000
H1	H1D067	67	Oncology	12	Classified Oncology		1000
H1	H1D068	68	Vascular and Spine Surgery	13	Classified Vascular Surgeon		1000
H1	H1D069	69	Vascular and Spine Surgery	13	Classified Vascular Surgeon		1000
H1	H1D070	70	Vascular and Spine Surgery	13	Classified Spine Surgeon		1000
H1	H1D071	71	Vascular and Spine Surgery	13	HOD Vascular Surgery		1000
H1	H1D072	72	Vascular and Spine Surgery	13	Classifed Spine Surgeon		1000
H1	H1D073	73	Vascular and Spine Surgery	13	HOD Spine Surgery		1000
H1	H1D074	74	Vascular and Spine Surgery	13	Classified Surgeon		1000
H1	H1D075	75	Vascular and Spine Surgery	13	Classified Surgeon		1000
H1	H1D076	76	Vascular and Spine Surgery	13	Classified Surgeon		1000
H1	H1D077	77	Orthopaedics	14	Classified Orthopedic Surgeon		1000
H1	H1D078	78	Orthopaedics	14	Classified Orthopedic Surgeon		1000
H1	H1D079	79	Orthopaedics	14	Advisor/ HOD Orthopedic Surgery		1000
H1	H1D080	80	Orthopaedics	14	Orthopedic Surgeon		1000
H1	H1D081	81	Orthopaedics	14	Orthopedic Surgeon		1000
H2	H2D001	82	Cardiology	15	HOD Interventional Cardiology		3000
H2	H2D002	83	Cardiology	15	Consultant Cardiology		3000
H2	H2D003	84	Cardiology	15	Consultant Cardiology		3000
H2	H2D004	85	Cardiology	15	Consultant Cardiology		3000
H2	H2D005	86	Cardiology	15	Classified Medical Specialist and Consultant Cardiology Fellowship in Cardiology (UK)		3000
H2	H2D006	87	Cardiology	15	Prof of Cardiology Fellowship Interventional Cardiology (UK)		3000
H2	H2D007	88	Cardiology	15	Classified Medical Specialist Consultant Cardiology and Physician		3000
H2	H2D008	89	Cardiology	15	Consultant Cardiology		3000
H2	H2D009	90	Cardiology	15	Samore Pro of Cardiology Consultant Cardiology & Physician		3000
H3	H3D001	91	Child Specialist	3	Classified Child Specialist		1000
H3	H3D002	92	Child Specialist	3	Classified Child Specialist & Consultant Neonatologist		1000
H3	H3D003	93	Paediatrics	1	HOD Classified Paediatrician & Laparoscopic Surgeon		1000
H3	H3D004	94	Paediatrics	1	HOD Classified Paediatrician & Laparoscopic Surgeon		1000
H3	H3D005	95	Paediatrics	1	Classified General and Paediatrician Surgeon		1000
H3	H3D006	96	Paediatrics	1	Classified General and Paediatrician Surgeon		1000
H3	H3D007	97	Dermatology	11	Classified Dermatology		1000
H3	H3D008	98	Dermatology	11	Classified Dermatology		1000
H3	H3D009	99	Dermatology	11	Classified Dermatology		1000
H1	H1D001	1	Paediatrics	1	Classified Paediatrician		1000
H1	H1D002	2	Paediatrics	1	Consultant Neonatal Paediatrician & Paeds Neurologist		1000
H1	H1D003	3	Paediatrics	1	Classified Paediatrician		1000
H1	H1D004	4	Paediatrics	1	Classified Paediatrician		1000
H1	H1D005	5	Paediatrics	1	Classified Paediatrician		1000
H1	H1D006	6	Paediatrics Oncology	2	HOD Paediatrics Oncology		1000
H1	H1D007	7	Child Specialist	3	Classified Child Specialist		1000
H1	H1D008	8	Child Specialist	3	Classified Child Specialist		1000
H1	H1D009	9	Child Specialist	3	Classified Child Specialist		1000
H1	H1D010	10	Child Specialist	3	Classified Child Specialist		1000
H1	H1D011	11	Child Specialist	3	HOD Classified Child Specialist		1000
H1	H1D012	12	Neurology	4	Classified Neuro Surgeon		1000
H1	H1D013	13	Gynaecology	5	Classified Gynacologist		1000
H1	H1D014	14	Gynaecology	5	Classified Gynacologist		1000
H1	H1D015	15	Gynaecology	5	Classified Gynacologist		1000
H1	H1D016	16	Gynaecology	5	Classified Gynacologist		1000
H1	H1D017	17	Gynaecology	5	Classified Gynacologist		1000
H1	H1D018	18	Gynaecology	5	Classified Gynacologist		1000
H1	H1D019	19	Gynaecology	5	Classified Gynacologist		1000
H1	H1D020	20	Gynaecology	5	Classified Gynacologist		1000
H1	H1D021	21	Gynaecology	5	Classified Gynacologist		1000
H1	H1D022	22	Gynaecology	5	Classified Gynacologist		1000
H1	H1D023	23	Gynaecology	5	Classified Gynacologist		1000
H1	H1D024	24	Urology	6	Classified Urologist		1000
H1	H1D025	25	Urology	6	Classified Urologist		1000
H1	H1D026	26	Urology	6	Classified Urologist		1000
H1	H1D027	27	Urology	6	Classified Urologist		1000
H1	H1D028	28	Urology	6	Classified Urologist		1000
H1	H1D029	29	Urology	6	Classified Urologist		1000
H1	H1D030	30	Urology	6	Classified Urologist		1000
H1	H1D031	31	Plastic Surgery	7	Classified Plastics Surgeon		1000
H1	H1D032	32	Plastic Surgery	7	Classified Plastics Surgeon		1000
H1	H1D033	33	Plastic Surgery	7	Classified Plastics Surgeon		1000
H1	H1D034	34	ENT	8	Classified ENT		1000
H1	H1D035	35	ENT	8	Classified ENT		1000
H1	H1D036	36	ENT	8	Classified ENT		1000
H1	H1D037	37	ENT	8	Classified ENT		1000
H1	H1D038	38	ENT	8	Classified ENT		1000
H1	H1D039	39	ENT	8	Classified ENT		1000
H1	H1D040	40	ENT	8	HOD Classified ENT		1000
H1	H1D041	41	ENT	8	Classified ENT		1000
H1	H1D042	42	General Surgery	9	Classified Surgeon and Laproscopic Surgeon		1000
H1	H1D043	43	General Surgery	9	Classified Surgeon and Laproscopic Surgeon		1000
H1	H1D044	44	General Surgery	9	Classified Surgeon and Laproscopic Surgeon		1000
H1	H1D045	45	General Surgery	9	Classified Surgeon and Laproscopic Surgeon		1000
H1	H1D046	46	General Surgery	9	HOD Surgery		1000
H1	H1D047	47	General Surgery	9	Classified Surgeon and Laproscopic Surgeon		1000
H1	H1D048	48	General Surgery	9	Classified Surgeon and Laproscopic Surgeon		1000
H1	H1D049	49	General Surgery	9	Classified Surgeon and Laproscopic Surgeon		1000
H1	H1D050	50	Neuro and Thoracic Surgery	10	Thoracic Surgeon		1000
H1	H1D051	51	Neuro and Thoracic Surgery	10	Thoracic Surgeon		1000
H1	H1D052	52	Neuro and Thoracic Surgery	10	Classified Thoracic Surgeon		1000
H1	H1D053	53	Neuro and Thoracic Surgery	10	Classified Neuro Surgeon and Spinal Surgeon		1000
H1	H1D054	54	Neuro and Thoracic Surgery	10	Prof of Surgery HOD and Advisor Thoracic		1000
H1	H1D055	55	Neuro and Thoracic Surgery	10	Advisor and HOD Neuro Surgery		1000
H1	H1D056	56	Neuro and Thoracic Surgery	10	Classified Neuro Surgeon		1000
H1	H1D057	57	Dermatology	11	Classified Dermatology		1000
H1	H1D058	58	Dermatology	11	Classified Dermatology		1000
H1	H1D059	59	Dermatology	11	HOD Dermatology		1000
H1	H1D060	60	Dermatology	11	Classified Dermatology		1000
H1	H1D061	61	Dermatology	11	Classified Dermatology		1000
H1	H1D062	62	Dermatology	11	Classified Rehab		1000
H1	H1D063	63	Dermatology	11	Nutritionist		1000
H1	H1D064	64	Oncology	12	Classified Oncology		1000
H1	H1D065	65	Oncology	12	Classified Oncology		1000
H1	H1D066	66	Oncology	12	Classified Oncology		1000
H1	H1D067	67	Oncology	12	Classified Oncology		1000
H1	H1D068	68	Vascular and Spine Surgery	13	Classified Vascular Surgeon		1000
H1	H1D069	69	Vascular and Spine Surgery	13	Classified Vascular Surgeon		1000
H1	H1D070	70	Vascular and Spine Surgery	13	Classified Spine Surgeon		1000
H1	H1D071	71	Vascular and Spine Surgery	13	HOD Vascular Surgery		1000
H1	H1D072	72	Vascular and Spine Surgery	13	Classifed Spine Surgeon		1000
H1	H1D073	73	Vascular and Spine Surgery	13	HOD Spine Surgery		1000
H1	H1D074	74	Vascular and Spine Surgery	13	Classified Surgeon		1000
H1	H1D075	75	Vascular and Spine Surgery	13	Classified Surgeon		1000
H1	H1D076	76	Vascular and Spine Surgery	13	Classified Surgeon		1000
H1	H1D077	77	Orthopaedics	14	Classified Orthopedic Surgeon		1000
H1	H1D078	78	Orthopaedics	14	Classified Orthopedic Surgeon		1000
H1	H1D079	79	Orthopaedics	14	Advisor/ HOD Orthopedic Surgery		1000
H1	H1D080	80	Orthopaedics	14	Orthopedic Surgeon		1000
H1	H1D081	81	Orthopaedics	14	Orthopedic Surgeon		1000
H2	H2D001	82	Cardiology	15	HOD Interventional Cardiology		3000
H2	H2D002	83	Cardiology	15	Consultant Cardiology		3000
H2	H2D003	84	Cardiology	15	Consultant Cardiology		3000
H2	H2D004	85	Cardiology	15	Consultant Cardiology		3000
H2	H2D005	86	Cardiology	15	Classified Medical Specialist and Consultant Cardiology Fellowship in Cardiology (UK)		3000
H2	H2D006	87	Cardiology	15	Prof of Cardiology Fellowship Interventional Cardiology (UK)		3000
H2	H2D007	88	Cardiology	15	Classified Medical Specialist Consultant Cardiology and Physician		3000
H2	H2D008	89	Cardiology	15	Consultant Cardiology		3000
H2	H2D009	90	Cardiology	15	Samore Pro of Cardiology Consultant Cardiology & Physician		3000
H3	H3D001	91	Child Specialist	3	Classified Child Specialist		1000
H3	H3D002	92	Child Specialist	3	Classified Child Specialist & Consultant Neonatologist		1000
H3	H3D003	93	Paediatrics	1	HOD Classified Paediatrician & Laparoscopic Surgeon		1000
H3	H3D004	94	Paediatrics	1	HOD Classified Paediatrician & Laparoscopic Surgeon		1000
H3	H3D005	95	Paediatrics	1	Classified General and Paediatrician Surgeon		1000
H3	H3D006	96	Paediatrics	1	Classified General and Paediatrician Surgeon		1000
H3	H3D007	97	Dermatology	11	Classified Dermatology		1000
H3	H3D008	98	Dermatology	11	Classified Dermatology		1000
H3	H3D009	99	Dermatology	11	Classified Dermatology		1000
H1	H1D001	1	Paediatrics	1	Classified Paediatrician		1000
H1	H1D002	2	Paediatrics	1	Consultant Neonatal Paediatrician & Paeds Neurologist		1000
H1	H1D003	3	Paediatrics	1	Classified Paediatrician		1000
H1	H1D004	4	Paediatrics	1	Classified Paediatrician		1000
H1	H1D005	5	Paediatrics	1	Classified Paediatrician		1000
H1	H1D006	6	Paediatrics Oncology	2	HOD Paediatrics Oncology		1000
H1	H1D007	7	Child Specialist	3	Classified Child Specialist		1000
H1	H1D008	8	Child Specialist	3	Classified Child Specialist		1000
H1	H1D009	9	Child Specialist	3	Classified Child Specialist		1000
H1	H1D010	10	Child Specialist	3	Classified Child Specialist		1000
H1	H1D011	11	Child Specialist	3	HOD Classified Child Specialist		1000
H1	H1D012	12	Neurology	4	Classified Neuro Surgeon		1000
H1	H1D013	13	Gynaecology	5	Classified Gynacologist		1000
H1	H1D014	14	Gynaecology	5	Classified Gynacologist		1000
H1	H1D015	15	Gynaecology	5	Classified Gynacologist		1000
H1	H1D016	16	Gynaecology	5	Classified Gynacologist		1000
H1	H1D017	17	Gynaecology	5	Classified Gynacologist		1000
H1	H1D018	18	Gynaecology	5	Classified Gynacologist		1000
H1	H1D019	19	Gynaecology	5	Classified Gynacologist		1000
H1	H1D020	20	Gynaecology	5	Classified Gynacologist		1000
H1	H1D021	21	Gynaecology	5	Classified Gynacologist		1000
H1	H1D022	22	Gynaecology	5	Classified Gynacologist		1000
H1	H1D023	23	Gynaecology	5	Classified Gynacologist		1000
H1	H1D024	24	Urology	6	Classified Urologist		1000
H1	H1D025	25	Urology	6	Classified Urologist		1000
H1	H1D026	26	Urology	6	Classified Urologist		1000
H1	H1D027	27	Urology	6	Classified Urologist		1000
H1	H1D028	28	Urology	6	Classified Urologist		1000
H1	H1D029	29	Urology	6	Classified Urologist		1000
H1	H1D030	30	Urology	6	Classified Urologist		1000
H1	H1D031	31	Plastic Surgery	7	Classified Plastics Surgeon		1000
H1	H1D032	32	Plastic Surgery	7	Classified Plastics Surgeon		1000
H1	H1D033	33	Plastic Surgery	7	Classified Plastics Surgeon		1000
H1	H1D034	34	ENT	8	Classified ENT		1000
H1	H1D035	35	ENT	8	Classified ENT		1000
H1	H1D036	36	ENT	8	Classified ENT		1000
H1	H1D037	37	ENT	8	Classified ENT		1000
H1	H1D038	38	ENT	8	Classified ENT		1000
H1	H1D039	39	ENT	8	Classified ENT		1000
H1	H1D040	40	ENT	8	HOD Classified ENT		1000
H1	H1D041	41	ENT	8	Classified ENT		1000
H1	H1D042	42	General Surgery	9	Classified Surgeon and Laproscopic Surgeon		1000
H1	H1D043	43	General Surgery	9	Classified Surgeon and Laproscopic Surgeon		1000
H1	H1D044	44	General Surgery	9	Classified Surgeon and Laproscopic Surgeon		1000
H1	H1D045	45	General Surgery	9	Classified Surgeon and Laproscopic Surgeon		1000
H1	H1D046	46	General Surgery	9	HOD Surgery		1000
H1	H1D047	47	General Surgery	9	Classified Surgeon and Laproscopic Surgeon		1000
H1	H1D048	48	General Surgery	9	Classified Surgeon and Laproscopic Surgeon		1000
H1	H1D049	49	General Surgery	9	Classified Surgeon and Laproscopic Surgeon		1000
H1	H1D050	50	Neuro and Thoracic Surgery	10	Thoracic Surgeon		1000
H1	H1D051	51	Neuro and Thoracic Surgery	10	Thoracic Surgeon		1000
H1	H1D052	52	Neuro and Thoracic Surgery	10	Classified Thoracic Surgeon		1000
H1	H1D053	53	Neuro and Thoracic Surgery	10	Classified Neuro Surgeon and Spinal Surgeon		1000
H1	H1D054	54	Neuro and Thoracic Surgery	10	Prof of Surgery HOD and Advisor Thoracic		1000
H1	H1D055	55	Neuro and Thoracic Surgery	10	Advisor and HOD Neuro Surgery		1000
H1	H1D056	56	Neuro and Thoracic Surgery	10	Classified Neuro Surgeon		1000
H1	H1D057	57	Dermatology	11	Classified Dermatology		1000
H1	H1D058	58	Dermatology	11	Classified Dermatology		1000
H1	H1D059	59	Dermatology	11	HOD Dermatology		1000
H1	H1D060	60	Dermatology	11	Classified Dermatology		1000
H1	H1D061	61	Dermatology	11	Classified Dermatology		1000
H1	H1D062	62	Dermatology	11	Classified Rehab		1000
H1	H1D063	63	Dermatology	11	Nutritionist		1000
H1	H1D064	64	Oncology	12	Classified Oncology		1000
H1	H1D065	65	Oncology	12	Classified Oncology		1000
H1	H1D066	66	Oncology	12	Classified Oncology		1000
H1	H1D067	67	Oncology	12	Classified Oncology		1000
H1	H1D068	68	Vascular and Spine Surgery	13	Classified Vascular Surgeon		1000
H1	H1D069	69	Vascular and Spine Surgery	13	Classified Vascular Surgeon		1000
H1	H1D070	70	Vascular and Spine Surgery	13	Classified Spine Surgeon		1000
H1	H1D071	71	Vascular and Spine Surgery	13	HOD Vascular Surgery		1000
H1	H1D072	72	Vascular and Spine Surgery	13	Classifed Spine Surgeon		1000
H1	H1D073	73	Vascular and Spine Surgery	13	HOD Spine Surgery		1000
H1	H1D074	74	Vascular and Spine Surgery	13	Classified Surgeon		1000
H1	H1D075	75	Vascular and Spine Surgery	13	Classified Surgeon		1000
H1	H1D076	76	Vascular and Spine Surgery	13	Classified Surgeon		1000
H1	H1D077	77	Orthopaedics	14	Classified Orthopedic Surgeon		1000
H1	H1D078	78	Orthopaedics	14	Classified Orthopedic Surgeon		1000
H1	H1D079	79	Orthopaedics	14	Advisor/ HOD Orthopedic Surgery		1000
H1	H1D080	80	Orthopaedics	14	Orthopedic Surgeon		1000
H1	H1D081	81	Orthopaedics	14	Orthopedic Surgeon		1000
H2	H2D001	82	Cardiology	15	HOD Interventional Cardiology		3000
H2	H2D002	83	Cardiology	15	Consultant Cardiology		3000
H2	H2D003	84	Cardiology	15	Consultant Cardiology		3000
H2	H2D004	85	Cardiology	15	Consultant Cardiology		3000
H2	H2D005	86	Cardiology	15	Classified Medical Specialist and Consultant Cardiology Fellowship in Cardiology (UK)		3000
H2	H2D006	87	Cardiology	15	Prof of Cardiology Fellowship Interventional Cardiology (UK)		3000
H2	H2D007	88	Cardiology	15	Classified Medical Specialist Consultant Cardiology and Physician		3000
H2	H2D008	89	Cardiology	15	Consultant Cardiology		3000
H2	H2D009	90	Cardiology	15	Samore Pro of Cardiology Consultant Cardiology & Physician		3000
H3	H3D001	91	Child Specialist	3	Classified Child Specialist		1000
H3	H3D002	92	Child Specialist	3	Classified Child Specialist & Consultant Neonatologist		1000
H3	H3D003	93	Paediatrics	1	HOD Classified Paediatrician & Laparoscopic Surgeon		1000
H3	H3D004	94	Paediatrics	1	HOD Classified Paediatrician & Laparoscopic Surgeon		1000
H3	H3D005	95	Paediatrics	1	Classified General and Paediatrician Surgeon		1000
H3	H3D006	96	Paediatrics	1	Classified General and Paediatrician Surgeon		1000
H3	H3D007	97	Dermatology	11	Classified Dermatology		1000
H3	H3D008	98	Dermatology	11	Classified Dermatology		1000
H3	H3D009	99	Dermatology	11	Classified Dermatology		1000
H1	H1D001	1	Paediatrics	1	Classified Paediatrician		1000
H1	H1D002	2	Paediatrics	1	Consultant Neonatal Paediatrician & Paeds Neurologist		1000
H1	H1D003	3	Paediatrics	1	Classified Paediatrician		1000
H1	H1D004	4	Paediatrics	1	Classified Paediatrician		1000
H1	H1D005	5	Paediatrics	1	Classified Paediatrician		1000
H1	H1D006	6	Paediatrics Oncology	2	HOD Paediatrics Oncology		1000
H1	H1D007	7	Child Specialist	3	Classified Child Specialist		1000
H1	H1D008	8	Child Specialist	3	Classified Child Specialist		1000
H1	H1D009	9	Child Specialist	3	Classified Child Specialist		1000
H1	H1D010	10	Child Specialist	3	Classified Child Specialist		1000
H1	H1D011	11	Child Specialist	3	HOD Classified Child Specialist		1000
H1	H1D012	12	Neurology	4	Classified Neuro Surgeon		1000
H1	H1D013	13	Gynaecology	5	Classified Gynacologist		1000
H1	H1D014	14	Gynaecology	5	Classified Gynacologist		1000
H1	H1D015	15	Gynaecology	5	Classified Gynacologist		1000
H1	H1D016	16	Gynaecology	5	Classified Gynacologist		1000
H1	H1D017	17	Gynaecology	5	Classified Gynacologist		1000
H1	H1D018	18	Gynaecology	5	Classified Gynacologist		1000
H1	H1D019	19	Gynaecology	5	Classified Gynacologist		1000
H1	H1D020	20	Gynaecology	5	Classified Gynacologist		1000
H1	H1D021	21	Gynaecology	5	Classified Gynacologist		1000
H1	H1D022	22	Gynaecology	5	Classified Gynacologist		1000
H1	H1D023	23	Gynaecology	5	Classified Gynacologist		1000
H1	H1D024	24	Urology	6	Classified Urologist		1000
H1	H1D025	25	Urology	6	Classified Urologist		1000
H1	H1D026	26	Urology	6	Classified Urologist		1000
H1	H1D027	27	Urology	6	Classified Urologist		1000
H1	H1D028	28	Urology	6	Classified Urologist		1000
H1	H1D029	29	Urology	6	Classified Urologist		1000
H1	H1D030	30	Urology	6	Classified Urologist		1000
H1	H1D031	31	Plastic Surgery	7	Classified Plastics Surgeon		1000
H1	H1D032	32	Plastic Surgery	7	Classified Plastics Surgeon		1000
H1	H1D033	33	Plastic Surgery	7	Classified Plastics Surgeon		1000
H1	H1D034	34	ENT	8	Classified ENT		1000
H1	H1D035	35	ENT	8	Classified ENT		1000
H1	H1D036	36	ENT	8	Classified ENT		1000
H1	H1D037	37	ENT	8	Classified ENT		1000
H1	H1D038	38	ENT	8	Classified ENT		1000
H1	H1D039	39	ENT	8	Classified ENT		1000
H1	H1D040	40	ENT	8	HOD Classified ENT		1000
H1	H1D041	41	ENT	8	Classified ENT		1000
H1	H1D042	42	General Surgery	9	Classified Surgeon and Laproscopic Surgeon		1000
H1	H1D043	43	General Surgery	9	Classified Surgeon and Laproscopic Surgeon		1000
H1	H1D044	44	General Surgery	9	Classified Surgeon and Laproscopic Surgeon		1000
H1	H1D045	45	General Surgery	9	Classified Surgeon and Laproscopic Surgeon		1000
H1	H1D046	46	General Surgery	9	HOD Surgery		1000
H1	H1D047	47	General Surgery	9	Classified Surgeon and Laproscopic Surgeon		1000
H1	H1D048	48	General Surgery	9	Classified Surgeon and Laproscopic Surgeon		1000
H1	H1D049	49	General Surgery	9	Classified Surgeon and Laproscopic Surgeon		1000
H1	H1D050	50	Neuro and Thoracic Surgery	10	Thoracic Surgeon		1000
H1	H1D051	51	Neuro and Thoracic Surgery	10	Thoracic Surgeon		1000
H1	H1D052	52	Neuro and Thoracic Surgery	10	Classified Thoracic Surgeon		1000
H1	H1D053	53	Neuro and Thoracic Surgery	10	Classified Neuro Surgeon and Spinal Surgeon		1000
H1	H1D054	54	Neuro and Thoracic Surgery	10	Prof of Surgery HOD and Advisor Thoracic		1000
H1	H1D055	55	Neuro and Thoracic Surgery	10	Advisor and HOD Neuro Surgery		1000
H1	H1D056	56	Neuro and Thoracic Surgery	10	Classified Neuro Surgeon		1000
H1	H1D057	57	Dermatology	11	Classified Dermatology		1000
H1	H1D058	58	Dermatology	11	Classified Dermatology		1000
H1	H1D059	59	Dermatology	11	HOD Dermatology		1000
H1	H1D060	60	Dermatology	11	Classified Dermatology		1000
H1	H1D061	61	Dermatology	11	Classified Dermatology		1000
H1	H1D062	62	Dermatology	11	Classified Rehab		1000
H1	H1D063	63	Dermatology	11	Nutritionist		1000
H1	H1D064	64	Oncology	12	Classified Oncology		1000
H1	H1D065	65	Oncology	12	Classified Oncology		1000
H1	H1D066	66	Oncology	12	Classified Oncology		1000
H1	H1D067	67	Oncology	12	Classified Oncology		1000
H1	H1D068	68	Vascular and Spine Surgery	13	Classified Vascular Surgeon		1000
H1	H1D069	69	Vascular and Spine Surgery	13	Classified Vascular Surgeon		1000
H1	H1D070	70	Vascular and Spine Surgery	13	Classified Spine Surgeon		1000
H1	H1D071	71	Vascular and Spine Surgery	13	HOD Vascular Surgery		1000
H1	H1D072	72	Vascular and Spine Surgery	13	Classifed Spine Surgeon		1000
H1	H1D073	73	Vascular and Spine Surgery	13	HOD Spine Surgery		1000
H1	H1D074	74	Vascular and Spine Surgery	13	Classified Surgeon		1000
H1	H1D075	75	Vascular and Spine Surgery	13	Classified Surgeon		1000
H1	H1D076	76	Vascular and Spine Surgery	13	Classified Surgeon		1000
H1	H1D077	77	Orthopaedics	14	Classified Orthopedic Surgeon		1000
H1	H1D078	78	Orthopaedics	14	Classified Orthopedic Surgeon		1000
H1	H1D079	79	Orthopaedics	14	Advisor/ HOD Orthopedic Surgery		1000
H1	H1D080	80	Orthopaedics	14	Orthopedic Surgeon		1000
H1	H1D081	81	Orthopaedics	14	Orthopedic Surgeon		1000
H2	H2D001	82	Cardiology	15	HOD Interventional Cardiology		3000
H2	H2D002	83	Cardiology	15	Consultant Cardiology		3000
H2	H2D003	84	Cardiology	15	Consultant Cardiology		3000
H2	H2D004	85	Cardiology	15	Consultant Cardiology		3000
H2	H2D005	86	Cardiology	15	Classified Medical Specialist and Consultant Cardiology Fellowship in Cardiology (UK)		3000
H2	H2D006	87	Cardiology	15	Prof of Cardiology Fellowship Interventional Cardiology (UK)		3000
H2	H2D007	88	Cardiology	15	Classified Medical Specialist Consultant Cardiology and Physician		3000
H2	H2D008	89	Cardiology	15	Consultant Cardiology		3000
H2	H2D009	90	Cardiology	15	Samore Pro of Cardiology Consultant Cardiology & Physician		3000
H3	H3D001	91	Child Specialist	3	Classified Child Specialist		1000
H3	H3D002	92	Child Specialist	3	Classified Child Specialist & Consultant Neonatologist		1000
H3	H3D003	93	Paediatrics	1	HOD Classified Paediatrician & Laparoscopic Surgeon		1000
H3	H3D004	94	Paediatrics	1	HOD Classified Paediatrician & Laparoscopic Surgeon		1000
H3	H3D005	95	Paediatrics	1	Classified General and Paediatrician Surgeon		1000
H3	H3D006	96	Paediatrics	1	Classified General and Paediatrician Surgeon		1000
H3	H3D007	97	Dermatology	11	Classified Dermatology		1000
H3	H3D008	98	Dermatology	11	Classified Dermatology		1000
H3	H3D009	99	Dermatology	11	Classified Dermatology		1000
H1	H1D001	1	Paediatrics	1	Classified Paediatrician		1000
H1	H1D002	2	Paediatrics	1	Consultant Neonatal Paediatrician & Paeds Neurologist		1000
H1	H1D003	3	Paediatrics	1	Classified Paediatrician		1000
H1	H1D004	4	Paediatrics	1	Classified Paediatrician		1000
H1	H1D005	5	Paediatrics	1	Classified Paediatrician		1000
H1	H1D006	6	Paediatrics Oncology	2	HOD Paediatrics Oncology		1000
H1	H1D007	7	Child Specialist	3	Classified Child Specialist		1000
H1	H1D008	8	Child Specialist	3	Classified Child Specialist		1000
H1	H1D009	9	Child Specialist	3	Classified Child Specialist		1000
H1	H1D010	10	Child Specialist	3	Classified Child Specialist		1000
H1	H1D011	11	Child Specialist	3	HOD Classified Child Specialist		1000
H1	H1D012	12	Neurology	4	Classified Neuro Surgeon		1000
H1	H1D013	13	Gynaecology	5	Classified Gynacologist		1000
H1	H1D014	14	Gynaecology	5	Classified Gynacologist		1000
H1	H1D015	15	Gynaecology	5	Classified Gynacologist		1000
H1	H1D016	16	Gynaecology	5	Classified Gynacologist		1000
H1	H1D017	17	Gynaecology	5	Classified Gynacologist		1000
H1	H1D018	18	Gynaecology	5	Classified Gynacologist		1000
H1	H1D019	19	Gynaecology	5	Classified Gynacologist		1000
H1	H1D020	20	Gynaecology	5	Classified Gynacologist		1000
H1	H1D021	21	Gynaecology	5	Classified Gynacologist		1000
H1	H1D022	22	Gynaecology	5	Classified Gynacologist		1000
H1	H1D023	23	Gynaecology	5	Classified Gynacologist		1000
H1	H1D024	24	Urology	6	Classified Urologist		1000
H1	H1D025	25	Urology	6	Classified Urologist		1000
H1	H1D026	26	Urology	6	Classified Urologist		1000
H1	H1D027	27	Urology	6	Classified Urologist		1000
H1	H1D028	28	Urology	6	Classified Urologist		1000
H1	H1D029	29	Urology	6	Classified Urologist		1000
H1	H1D030	30	Urology	6	Classified Urologist		1000
H1	H1D031	31	Plastic Surgery	7	Classified Plastics Surgeon		1000
H1	H1D032	32	Plastic Surgery	7	Classified Plastics Surgeon		1000
H1	H1D033	33	Plastic Surgery	7	Classified Plastics Surgeon		1000
H1	H1D034	34	ENT	8	Classified ENT		1000
H1	H1D035	35	ENT	8	Classified ENT		1000
H1	H1D036	36	ENT	8	Classified ENT		1000
H1	H1D037	37	ENT	8	Classified ENT		1000
H1	H1D038	38	ENT	8	Classified ENT		1000
H1	H1D039	39	ENT	8	Classified ENT		1000
H1	H1D040	40	ENT	8	HOD Classified ENT		1000
H1	H1D041	41	ENT	8	Classified ENT		1000
H1	H1D042	42	General Surgery	9	Classified Surgeon and Laproscopic Surgeon		1000
H1	H1D043	43	General Surgery	9	Classified Surgeon and Laproscopic Surgeon		1000
H1	H1D044	44	General Surgery	9	Classified Surgeon and Laproscopic Surgeon		1000
H1	H1D045	45	General Surgery	9	Classified Surgeon and Laproscopic Surgeon		1000
H1	H1D046	46	General Surgery	9	HOD Surgery		1000
H1	H1D047	47	General Surgery	9	Classified Surgeon and Laproscopic Surgeon		1000
H1	H1D048	48	General Surgery	9	Classified Surgeon and Laproscopic Surgeon		1000
H1	H1D049	49	General Surgery	9	Classified Surgeon and Laproscopic Surgeon		1000
H1	H1D050	50	Neuro and Thoracic Surgery	10	Thoracic Surgeon		1000
H1	H1D051	51	Neuro and Thoracic Surgery	10	Thoracic Surgeon		1000
H1	H1D052	52	Neuro and Thoracic Surgery	10	Classified Thoracic Surgeon		1000
H1	H1D053	53	Neuro and Thoracic Surgery	10	Classified Neuro Surgeon and Spinal Surgeon		1000
H1	H1D054	54	Neuro and Thoracic Surgery	10	Prof of Surgery HOD and Advisor Thoracic		1000
H1	H1D055	55	Neuro and Thoracic Surgery	10	Advisor and HOD Neuro Surgery		1000
H1	H1D056	56	Neuro and Thoracic Surgery	10	Classified Neuro Surgeon		1000
H1	H1D057	57	Dermatology	11	Classified Dermatology		1000
H1	H1D058	58	Dermatology	11	Classified Dermatology		1000
H1	H1D059	59	Dermatology	11	HOD Dermatology		1000
H1	H1D060	60	Dermatology	11	Classified Dermatology		1000
H1	H1D061	61	Dermatology	11	Classified Dermatology		1000
H1	H1D062	62	Dermatology	11	Classified Rehab		1000
H1	H1D063	63	Dermatology	11	Nutritionist		1000
H1	H1D064	64	Oncology	12	Classified Oncology		1000
H1	H1D065	65	Oncology	12	Classified Oncology		1000
H1	H1D066	66	Oncology	12	Classified Oncology		1000
H1	H1D067	67	Oncology	12	Classified Oncology		1000
H1	H1D068	68	Vascular and Spine Surgery	13	Classified Vascular Surgeon		1000
H1	H1D069	69	Vascular and Spine Surgery	13	Classified Vascular Surgeon		1000
H1	H1D070	70	Vascular and Spine Surgery	13	Classified Spine Surgeon		1000
H1	H1D071	71	Vascular and Spine Surgery	13	HOD Vascular Surgery		1000
H1	H1D072	72	Vascular and Spine Surgery	13	Classifed Spine Surgeon		1000
H1	H1D073	73	Vascular and Spine Surgery	13	HOD Spine Surgery		1000
H1	H1D074	74	Vascular and Spine Surgery	13	Classified Surgeon		1000
H1	H1D075	75	Vascular and Spine Surgery	13	Classified Surgeon		1000
H1	H1D076	76	Vascular and Spine Surgery	13	Classified Surgeon		1000
H1	H1D077	77	Orthopaedics	14	Classified Orthopedic Surgeon		1000
H1	H1D078	78	Orthopaedics	14	Classified Orthopedic Surgeon		1000
H1	H1D079	79	Orthopaedics	14	Advisor/ HOD Orthopedic Surgery		1000
H1	H1D080	80	Orthopaedics	14	Orthopedic Surgeon		1000
H1	H1D081	81	Orthopaedics	14	Orthopedic Surgeon		1000
H2	H2D001	82	Cardiology	15	HOD Interventional Cardiology		3000
H2	H2D002	83	Cardiology	15	Consultant Cardiology		3000
H2	H2D003	84	Cardiology	15	Consultant Cardiology		3000
H2	H2D004	85	Cardiology	15	Consultant Cardiology		3000
H2	H2D005	86	Cardiology	15	Classified Medical Specialist and Consultant Cardiology Fellowship in Cardiology (UK)		3000
H2	H2D006	87	Cardiology	15	Prof of Cardiology Fellowship Interventional Cardiology (UK)		3000
H2	H2D007	88	Cardiology	15	Classified Medical Specialist Consultant Cardiology and Physician		3000
H2	H2D008	89	Cardiology	15	Consultant Cardiology		3000
H2	H2D009	90	Cardiology	15	Samore Pro of Cardiology Consultant Cardiology & Physician		3000
H3	H3D001	91	Child Specialist	3	Classified Child Specialist		1000
H3	H3D002	92	Child Specialist	3	Classified Child Specialist & Consultant Neonatologist		1000
H3	H3D003	93	Paediatrics	1	HOD Classified Paediatrician & Laparoscopic Surgeon		1000
H3	H3D004	94	Paediatrics	1	HOD Classified Paediatrician & Laparoscopic Surgeon		1000
H3	H3D005	95	Paediatrics	1	Classified General and Paediatrician Surgeon		1000
H3	H3D006	96	Paediatrics	1	Classified General and Paediatrician Surgeon		1000
H3	H3D007	97	Dermatology	11	Classified Dermatology		1000
H3	H3D008	98	Dermatology	11	Classified Dermatology		1000
H3	H3D009	99	Dermatology	11	Classified Dermatology		1000
H1	H1D001	1	Paediatrics	1	Classified Paediatrician		1000
H1	H1D002	2	Paediatrics	1	Consultant Neonatal Paediatrician & Paeds Neurologist		1000
H1	H1D003	3	Paediatrics	1	Classified Paediatrician		1000
H1	H1D004	4	Paediatrics	1	Classified Paediatrician		1000
H1	H1D005	5	Paediatrics	1	Classified Paediatrician		1000
H1	H1D006	6	Paediatrics Oncology	2	HOD Paediatrics Oncology		1000
H1	H1D007	7	Child Specialist	3	Classified Child Specialist		1000
H1	H1D008	8	Child Specialist	3	Classified Child Specialist		1000
H1	H1D009	9	Child Specialist	3	Classified Child Specialist		1000
H1	H1D010	10	Child Specialist	3	Classified Child Specialist		1000
H1	H1D011	11	Child Specialist	3	HOD Classified Child Specialist		1000
H1	H1D012	12	Neurology	4	Classified Neuro Surgeon		1000
H1	H1D013	13	Gynaecology	5	Classified Gynacologist		1000
H1	H1D014	14	Gynaecology	5	Classified Gynacologist		1000
H1	H1D015	15	Gynaecology	5	Classified Gynacologist		1000
H1	H1D016	16	Gynaecology	5	Classified Gynacologist		1000
H1	H1D017	17	Gynaecology	5	Classified Gynacologist		1000
H1	H1D018	18	Gynaecology	5	Classified Gynacologist		1000
H1	H1D019	19	Gynaecology	5	Classified Gynacologist		1000
H1	H1D020	20	Gynaecology	5	Classified Gynacologist		1000
H1	H1D021	21	Gynaecology	5	Classified Gynacologist		1000
H1	H1D022	22	Gynaecology	5	Classified Gynacologist		1000
H1	H1D023	23	Gynaecology	5	Classified Gynacologist		1000
H1	H1D024	24	Urology	6	Classified Urologist		1000
H1	H1D025	25	Urology	6	Classified Urologist		1000
H1	H1D026	26	Urology	6	Classified Urologist		1000
H1	H1D027	27	Urology	6	Classified Urologist		1000
H1	H1D028	28	Urology	6	Classified Urologist		1000
H1	H1D029	29	Urology	6	Classified Urologist		1000
H1	H1D030	30	Urology	6	Classified Urologist		1000
H1	H1D031	31	Plastic Surgery	7	Classified Plastics Surgeon		1000
H1	H1D032	32	Plastic Surgery	7	Classified Plastics Surgeon		1000
H1	H1D033	33	Plastic Surgery	7	Classified Plastics Surgeon		1000
H1	H1D034	34	ENT	8	Classified ENT		1000
H1	H1D035	35	ENT	8	Classified ENT		1000
H1	H1D036	36	ENT	8	Classified ENT		1000
H1	H1D037	37	ENT	8	Classified ENT		1000
H1	H1D038	38	ENT	8	Classified ENT		1000
H1	H1D039	39	ENT	8	Classified ENT		1000
H1	H1D040	40	ENT	8	HOD Classified ENT		1000
H1	H1D041	41	ENT	8	Classified ENT		1000
H1	H1D042	42	General Surgery	9	Classified Surgeon and Laproscopic Surgeon		1000
H1	H1D043	43	General Surgery	9	Classified Surgeon and Laproscopic Surgeon		1000
H1	H1D044	44	General Surgery	9	Classified Surgeon and Laproscopic Surgeon		1000
H1	H1D045	45	General Surgery	9	Classified Surgeon and Laproscopic Surgeon		1000
H1	H1D046	46	General Surgery	9	HOD Surgery		1000
H1	H1D047	47	General Surgery	9	Classified Surgeon and Laproscopic Surgeon		1000
H1	H1D048	48	General Surgery	9	Classified Surgeon and Laproscopic Surgeon		1000
H1	H1D049	49	General Surgery	9	Classified Surgeon and Laproscopic Surgeon		1000
H1	H1D050	50	Neuro and Thoracic Surgery	10	Thoracic Surgeon		1000
H1	H1D051	51	Neuro and Thoracic Surgery	10	Thoracic Surgeon		1000
H1	H1D052	52	Neuro and Thoracic Surgery	10	Classified Thoracic Surgeon		1000
H1	H1D053	53	Neuro and Thoracic Surgery	10	Classified Neuro Surgeon and Spinal Surgeon		1000
H1	H1D054	54	Neuro and Thoracic Surgery	10	Prof of Surgery HOD and Advisor Thoracic		1000
H1	H1D055	55	Neuro and Thoracic Surgery	10	Advisor and HOD Neuro Surgery		1000
H1	H1D056	56	Neuro and Thoracic Surgery	10	Classified Neuro Surgeon		1000
H1	H1D057	57	Dermatology	11	Classified Dermatology		1000
H1	H1D058	58	Dermatology	11	Classified Dermatology		1000
H1	H1D059	59	Dermatology	11	HOD Dermatology		1000
H1	H1D060	60	Dermatology	11	Classified Dermatology		1000
H1	H1D061	61	Dermatology	11	Classified Dermatology		1000
H1	H1D062	62	Dermatology	11	Classified Rehab		1000
H1	H1D063	63	Dermatology	11	Nutritionist		1000
H1	H1D064	64	Oncology	12	Classified Oncology		1000
H1	H1D065	65	Oncology	12	Classified Oncology		1000
H1	H1D066	66	Oncology	12	Classified Oncology		1000
H1	H1D067	67	Oncology	12	Classified Oncology		1000
H1	H1D068	68	Vascular and Spine Surgery	13	Classified Vascular Surgeon		1000
H1	H1D069	69	Vascular and Spine Surgery	13	Classified Vascular Surgeon		1000
H1	H1D070	70	Vascular and Spine Surgery	13	Classified Spine Surgeon		1000
H1	H1D071	71	Vascular and Spine Surgery	13	HOD Vascular Surgery		1000
H1	H1D072	72	Vascular and Spine Surgery	13	Classifed Spine Surgeon		1000
H1	H1D073	73	Vascular and Spine Surgery	13	HOD Spine Surgery		1000
H1	H1D074	74	Vascular and Spine Surgery	13	Classified Surgeon		1000
H1	H1D075	75	Vascular and Spine Surgery	13	Classified Surgeon		1000
H1	H1D076	76	Vascular and Spine Surgery	13	Classified Surgeon		1000
H1	H1D077	77	Orthopaedics	14	Classified Orthopedic Surgeon		1000
H1	H1D078	78	Orthopaedics	14	Classified Orthopedic Surgeon		1000
H1	H1D079	79	Orthopaedics	14	Advisor/ HOD Orthopedic Surgery		1000
H1	H1D080	80	Orthopaedics	14	Orthopedic Surgeon		1000
H1	H1D081	81	Orthopaedics	14	Orthopedic Surgeon		1000
H2	H2D001	82	Cardiology	15	HOD Interventional Cardiology		3000
H2	H2D002	83	Cardiology	15	Consultant Cardiology		3000
H2	H2D003	84	Cardiology	15	Consultant Cardiology		3000
H2	H2D004	85	Cardiology	15	Consultant Cardiology		3000
H2	H2D005	86	Cardiology	15	Classified Medical Specialist and Consultant Cardiology Fellowship in Cardiology (UK)		3000
H2	H2D006	87	Cardiology	15	Prof of Cardiology Fellowship Interventional Cardiology (UK)		3000
H2	H2D007	88	Cardiology	15	Classified Medical Specialist Consultant Cardiology and Physician		3000
H2	H2D008	89	Cardiology	15	Consultant Cardiology		3000
H2	H2D009	90	Cardiology	15	Samore Pro of Cardiology Consultant Cardiology & Physician		3000
H3	H3D001	91	Child Specialist	3	Classified Child Specialist		1000
H3	H3D002	92	Child Specialist	3	Classified Child Specialist & Consultant Neonatologist		1000
H3	H3D003	93	Paediatrics	1	HOD Classified Paediatrician & Laparoscopic Surgeon		1000
H3	H3D004	94	Paediatrics	1	HOD Classified Paediatrician & Laparoscopic Surgeon		1000
H3	H3D005	95	Paediatrics	1	Classified General and Paediatrician Surgeon		1000
H3	H3D006	96	Paediatrics	1	Classified General and Paediatrician Surgeon		1000
H3	H3D007	97	Dermatology	11	Classified Dermatology		1000
H3	H3D008	98	Dermatology	11	Classified Dermatology		1000
H3	H3D009	99	Dermatology	11	Classified Dermatology		1000
